# Supplementary material for: m6A demethylase ALKBH5 promotes tumor cell proliferation by destabilizing IGF2BPs target genes and worsens the prognosis of patients with non-small-cell lung cancer
Source: PubMed Central journal article supplement (PMC9576599; doi:10.1038/s41417-022-00451-8), 2022-03-22

Figure 1D

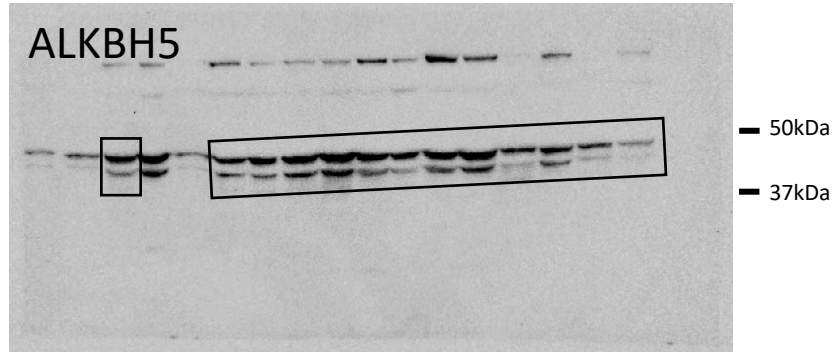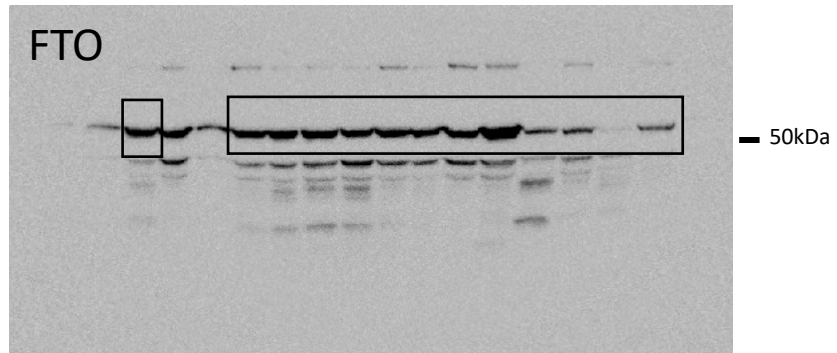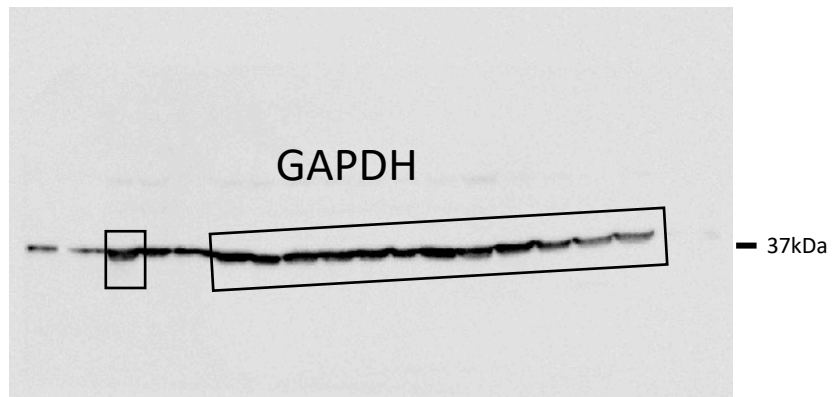

Figure 2A

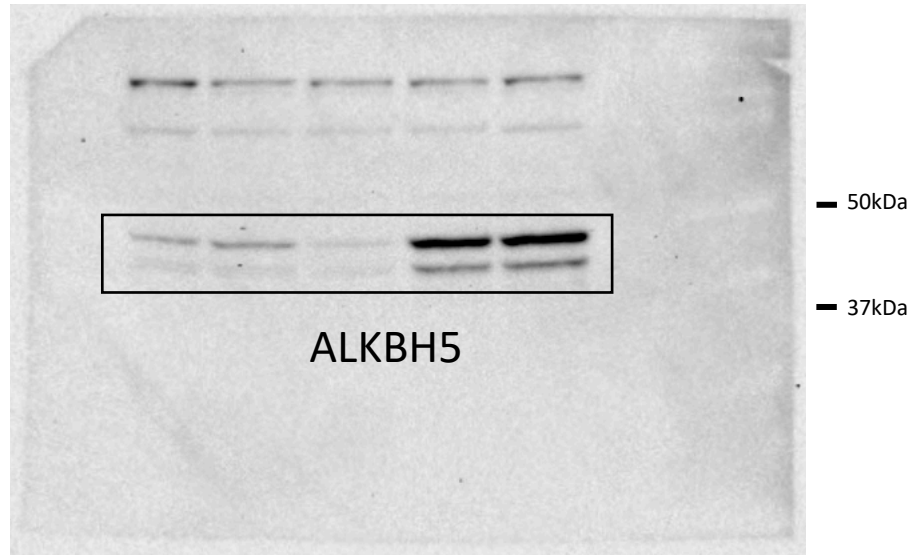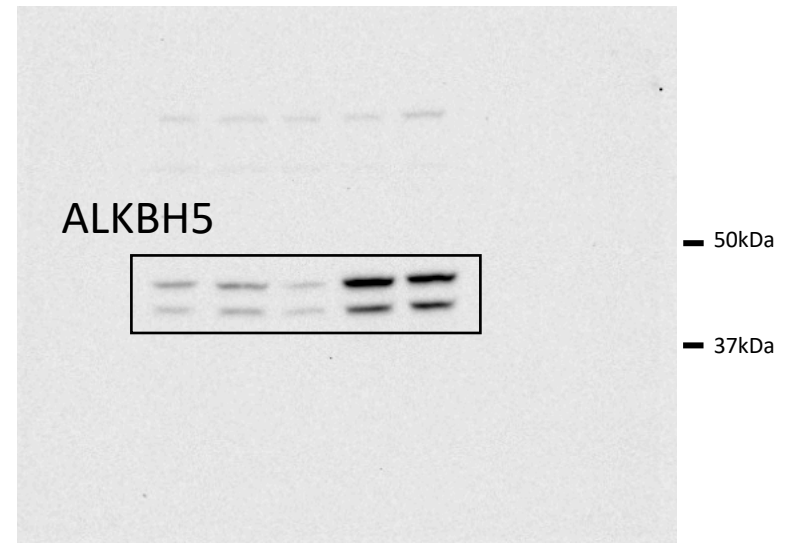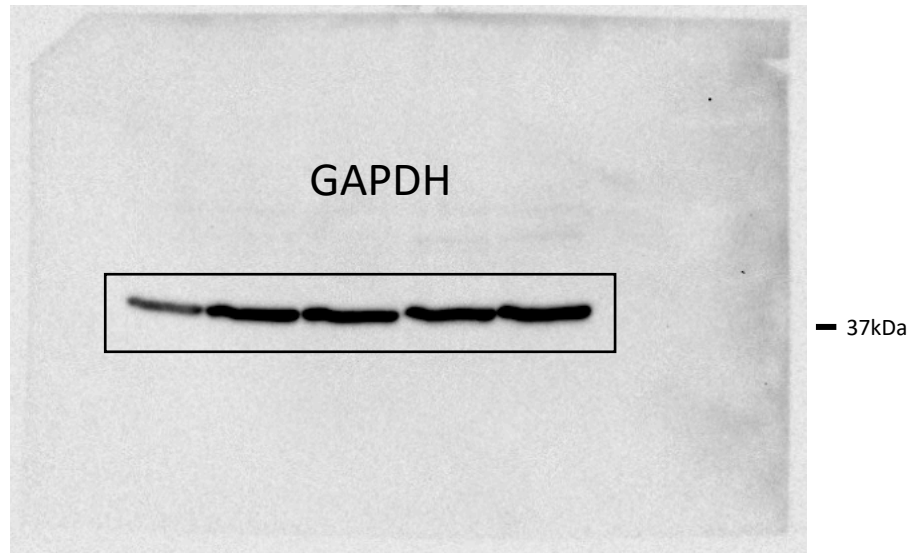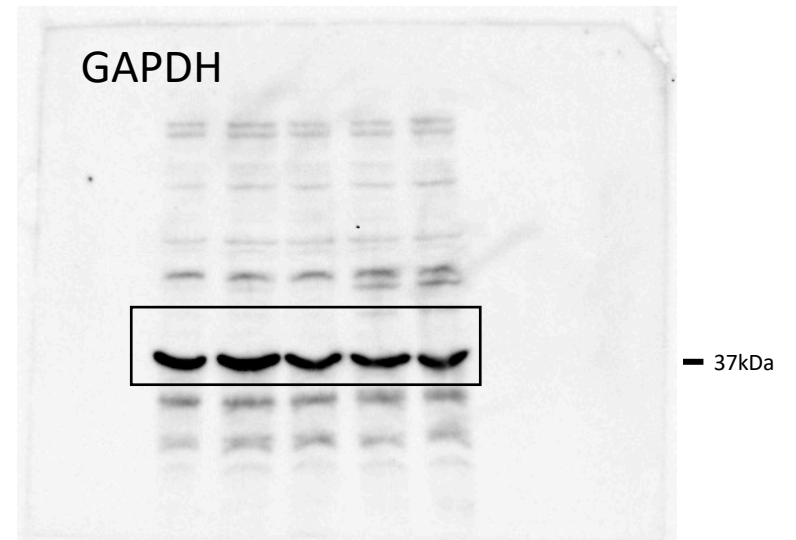

Figure 2A

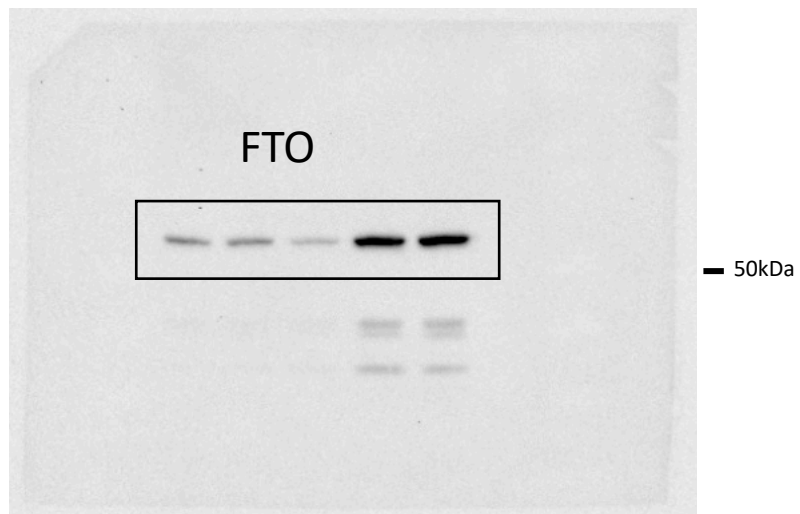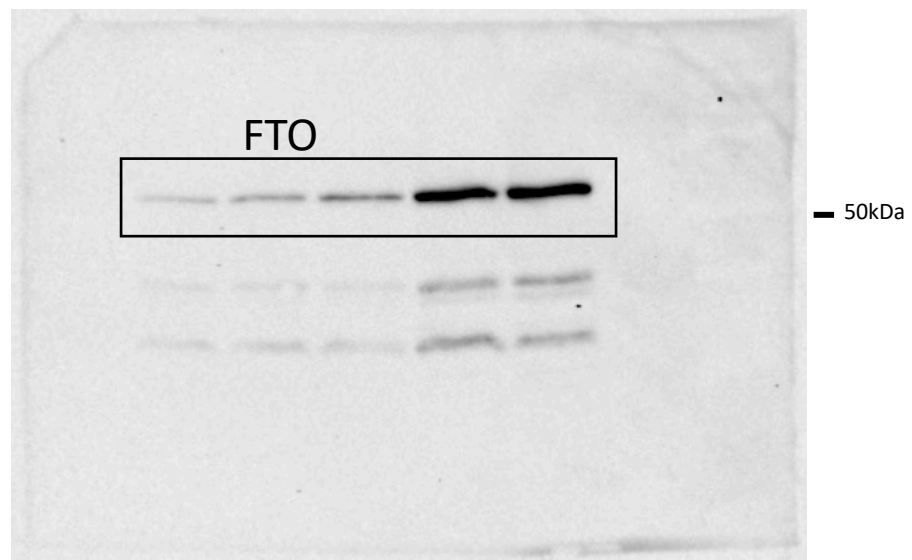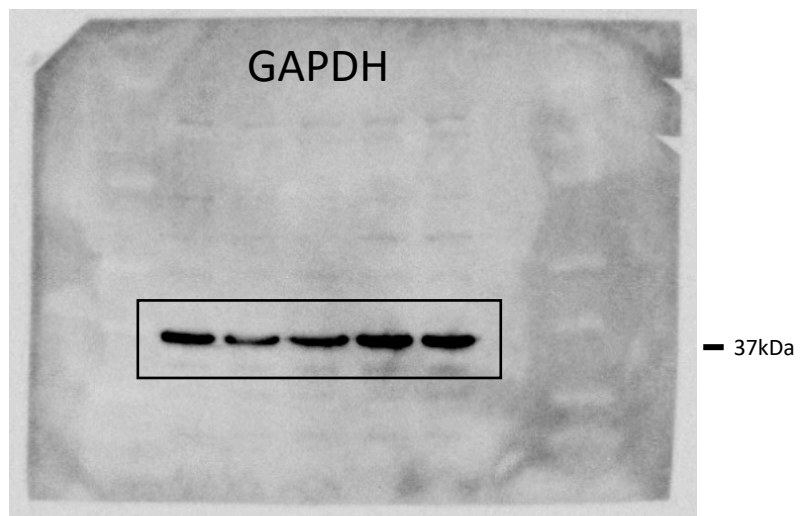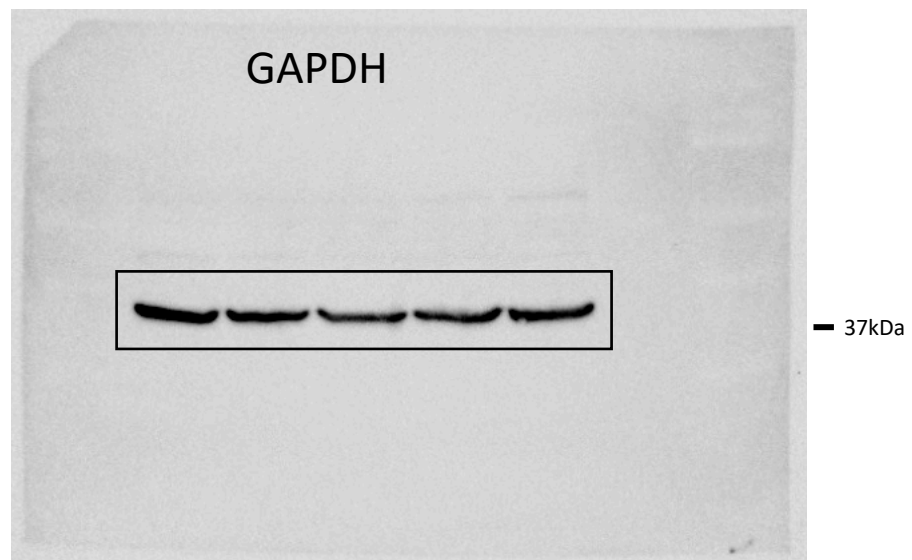

Figure 4A

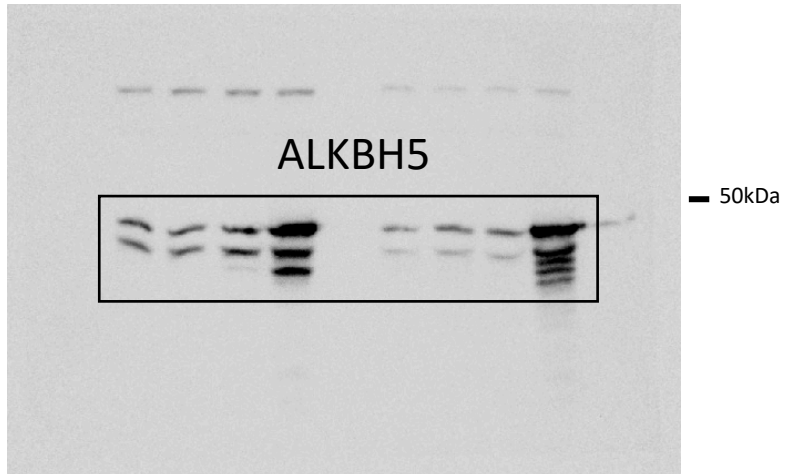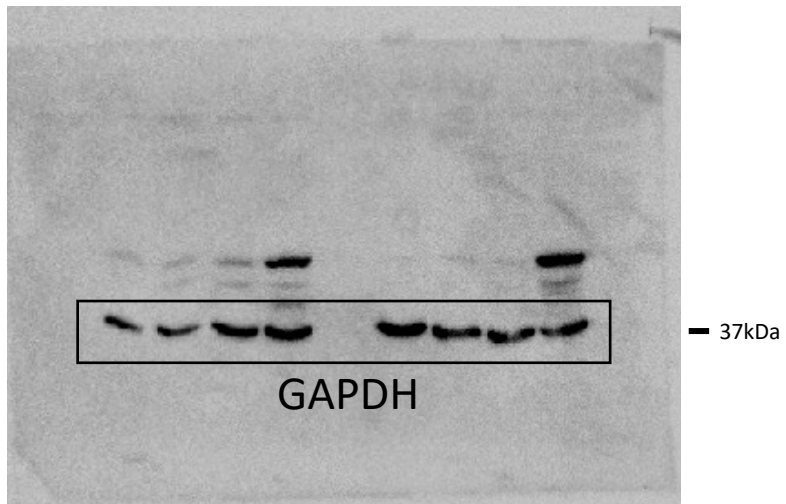

Figure 7B

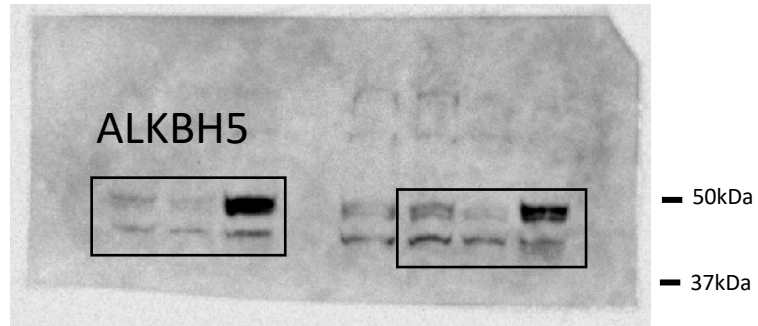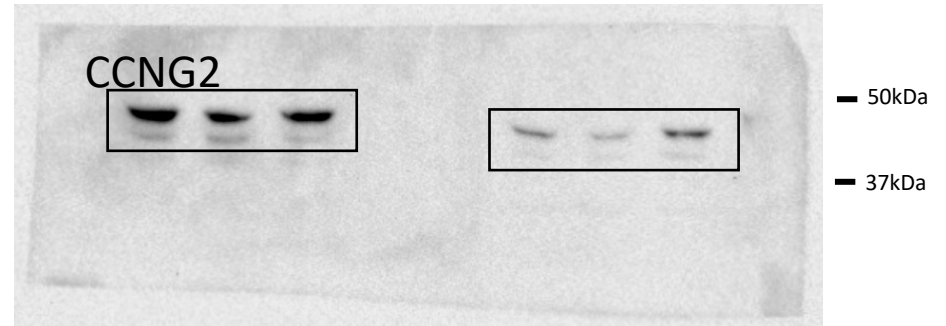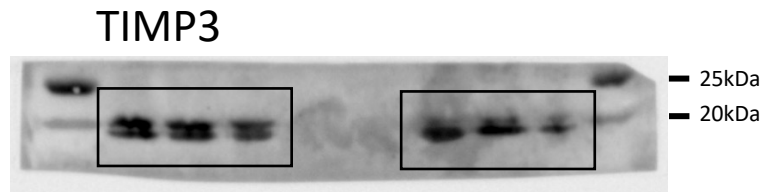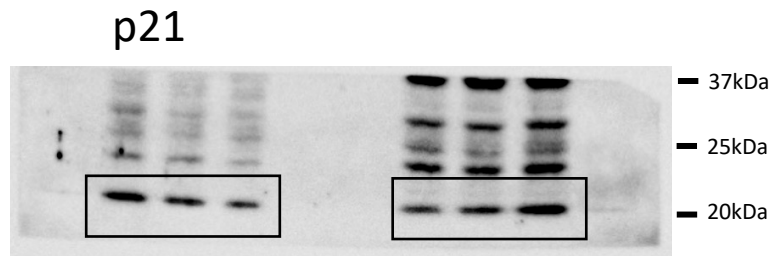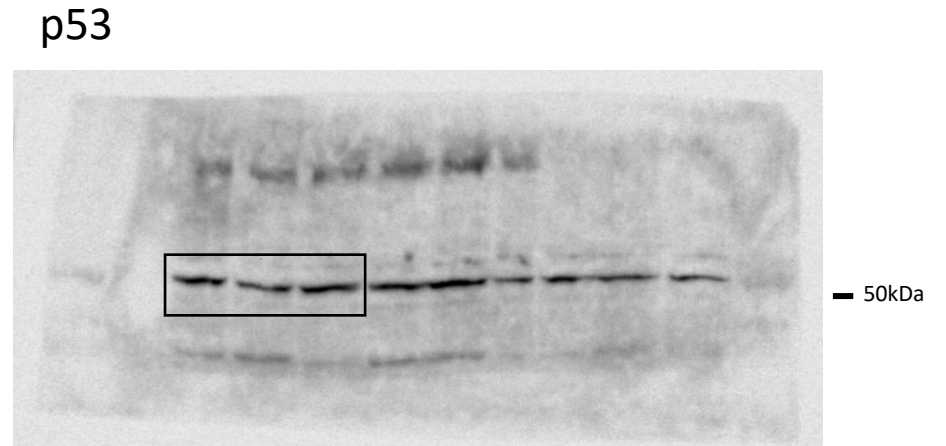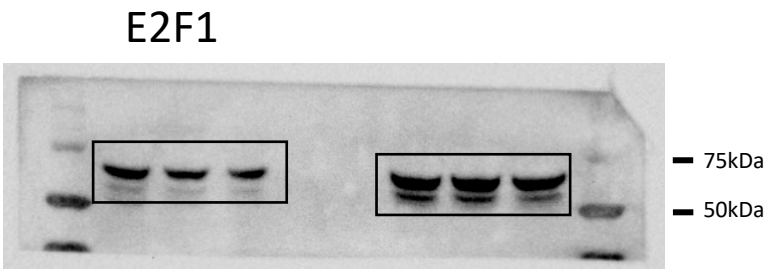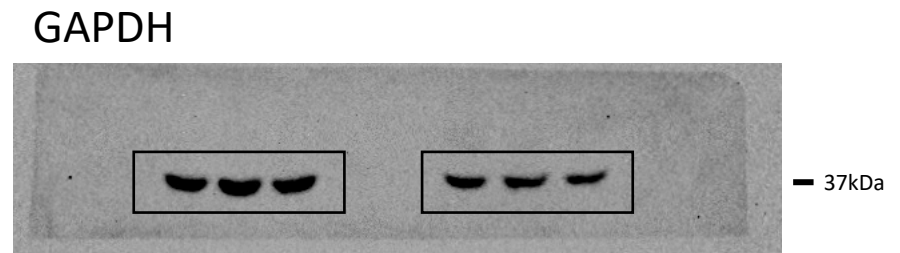

Figure 7C and Figure 7D

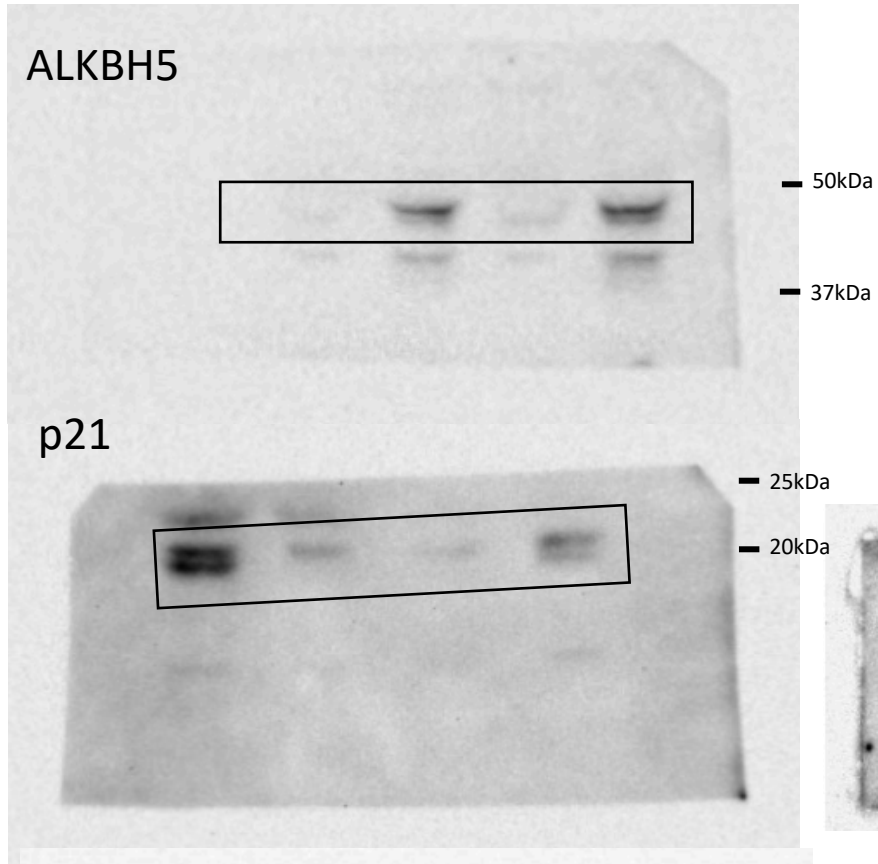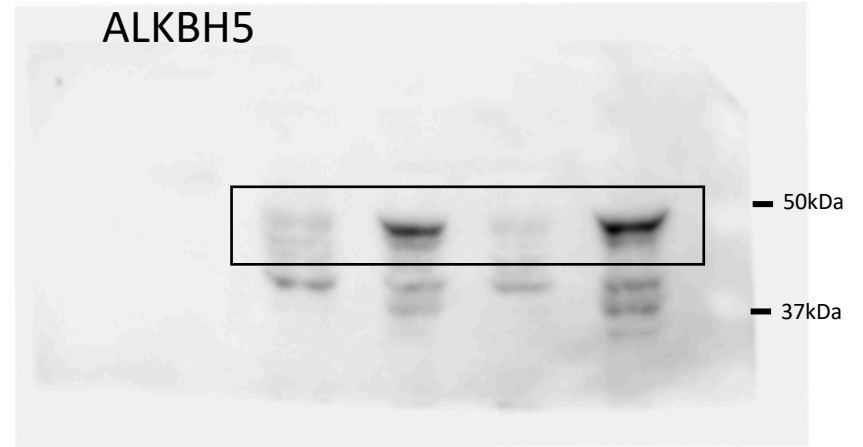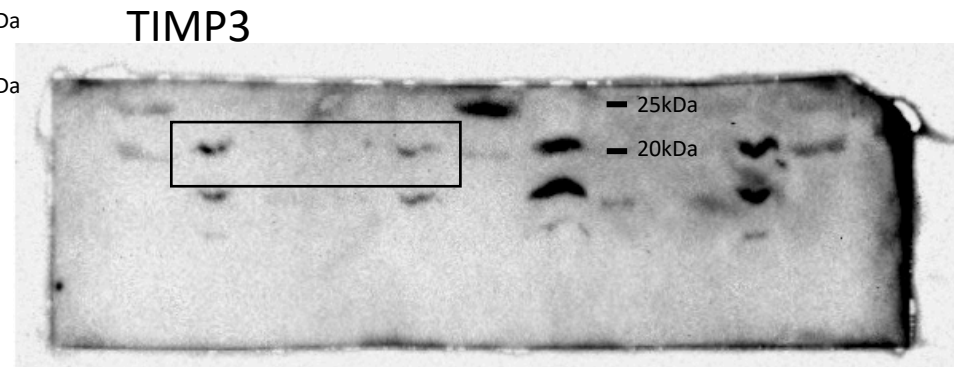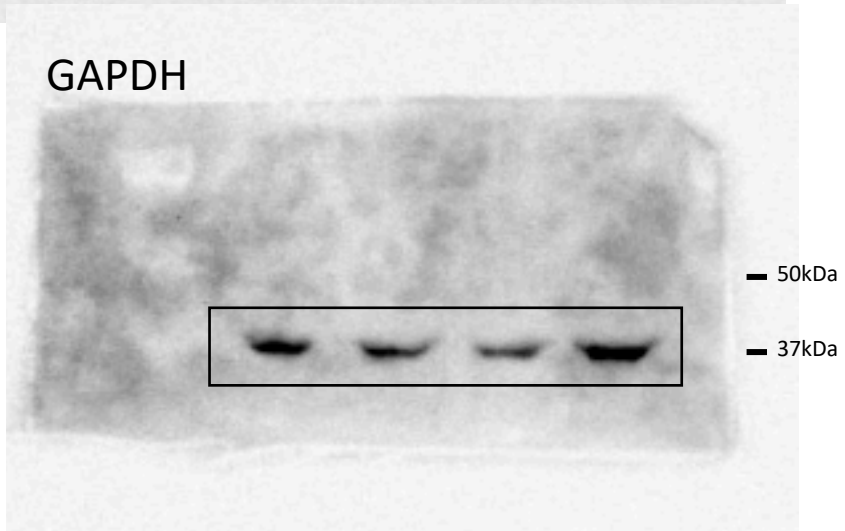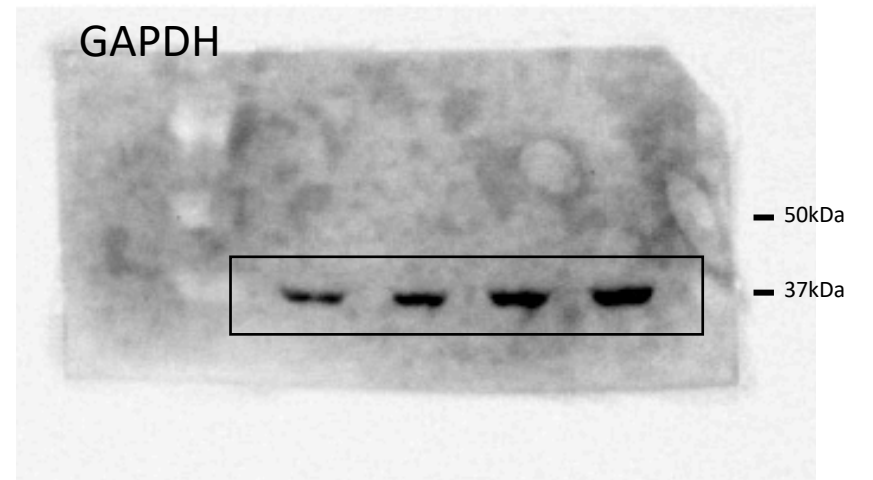

Figure 8A

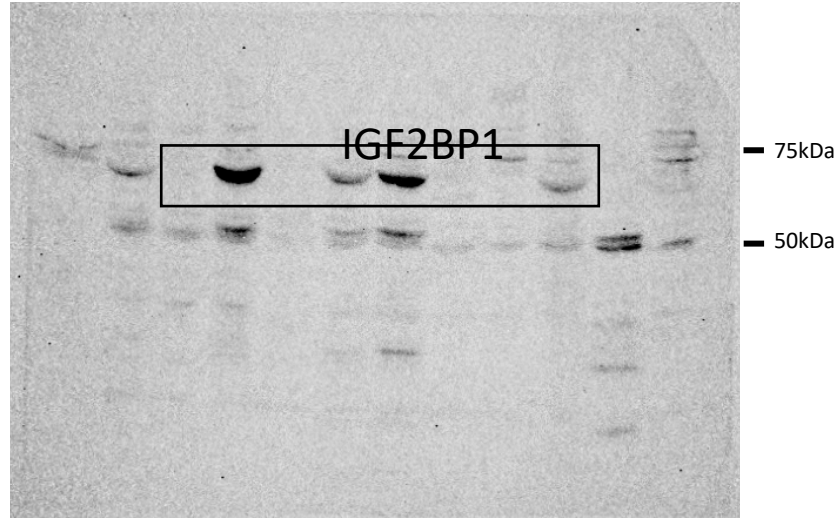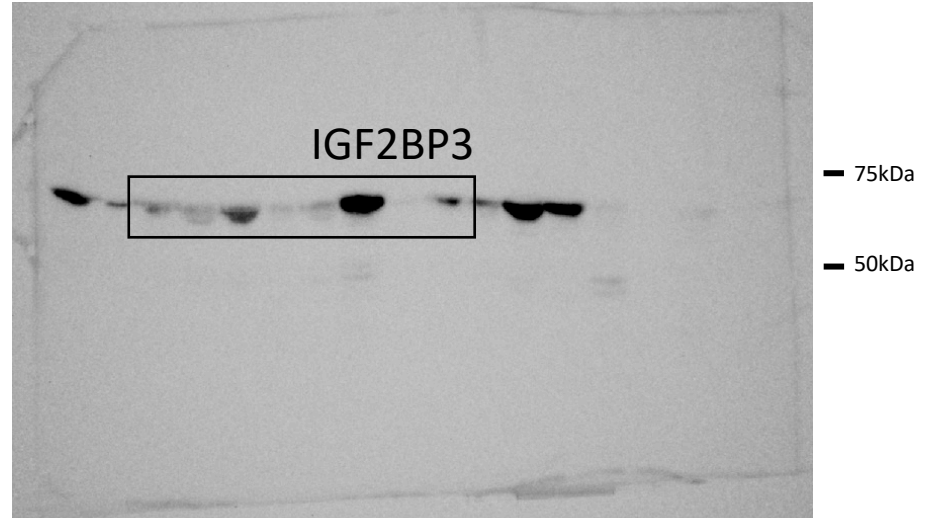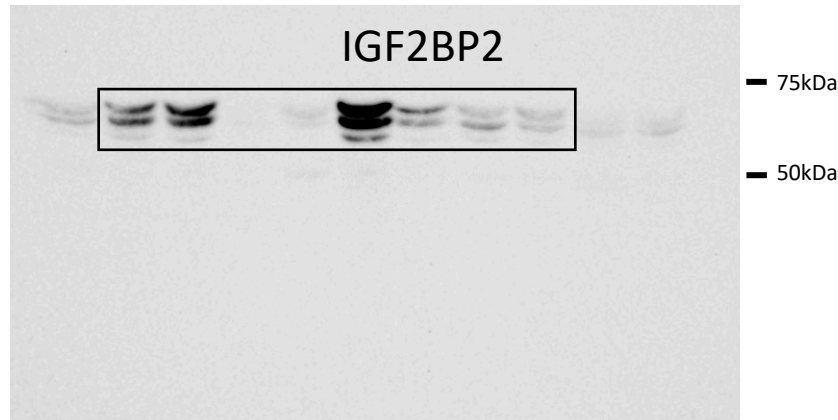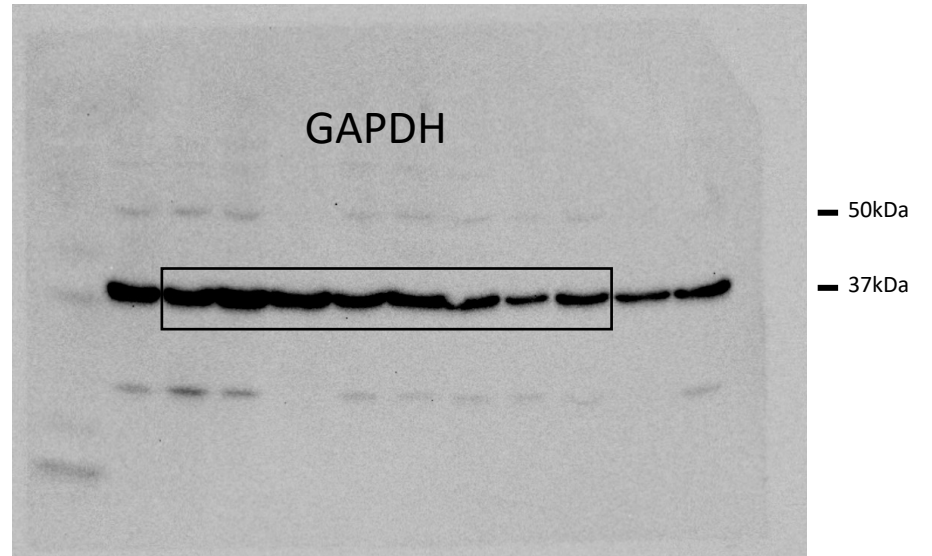

Figure 8B

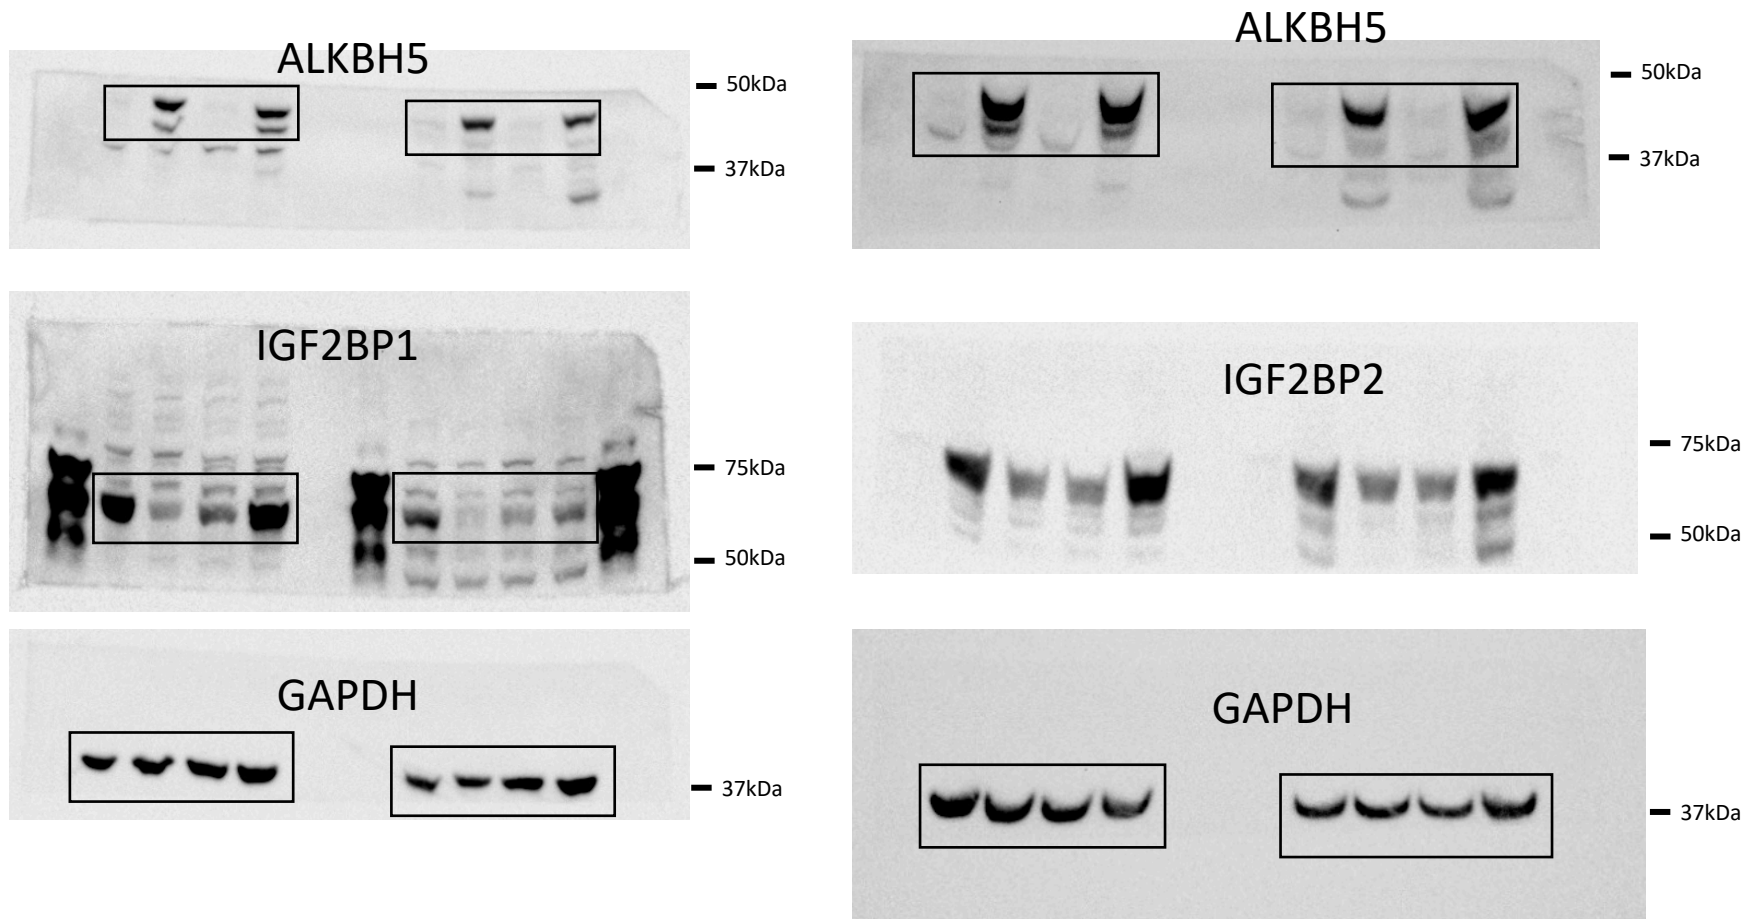



Figure 8B

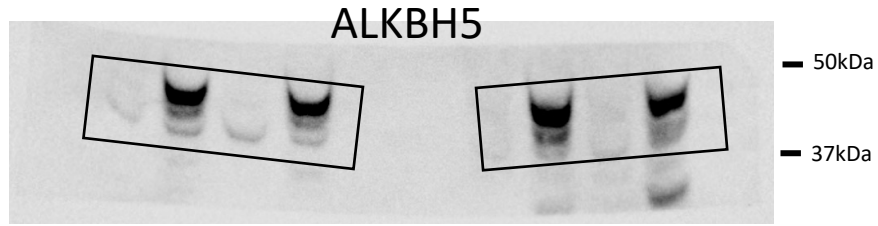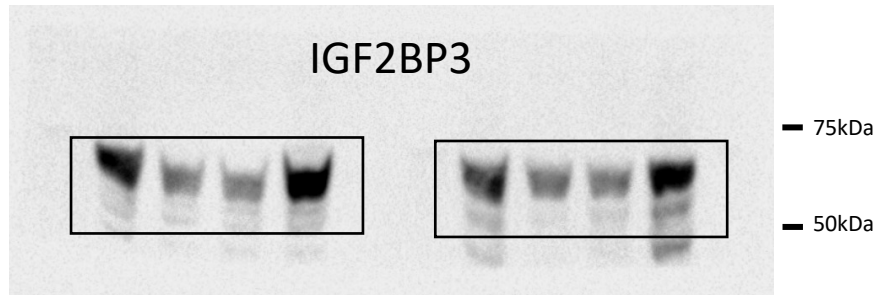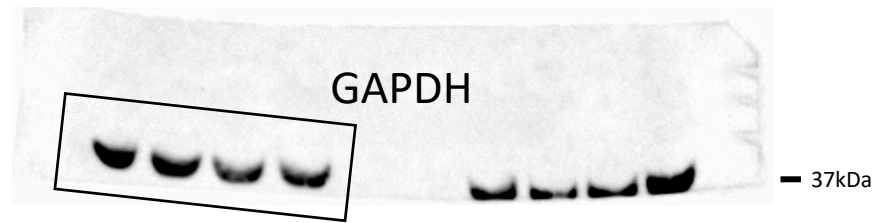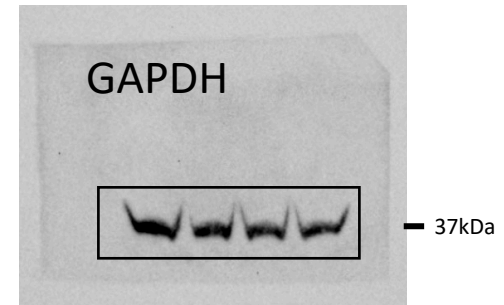

Figure 8D

YTHDF2

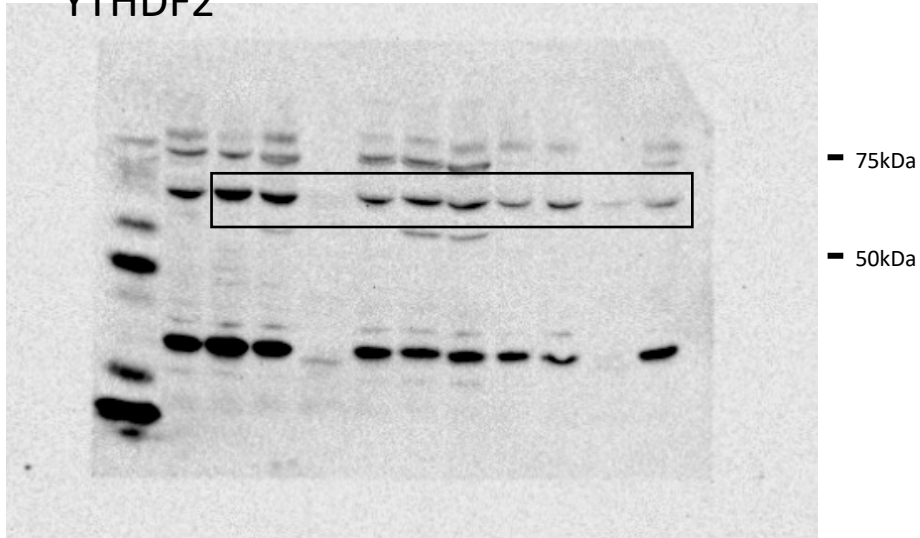

GAPDH

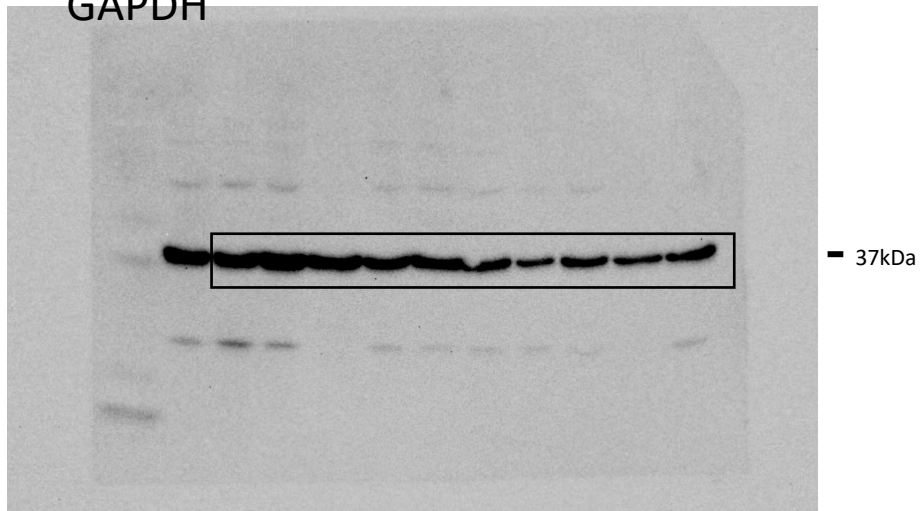

Figure S3D

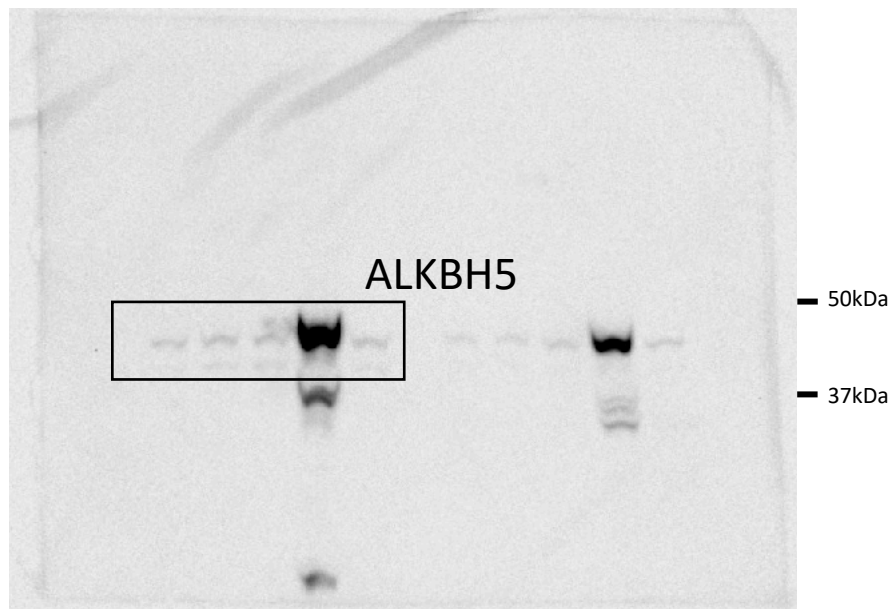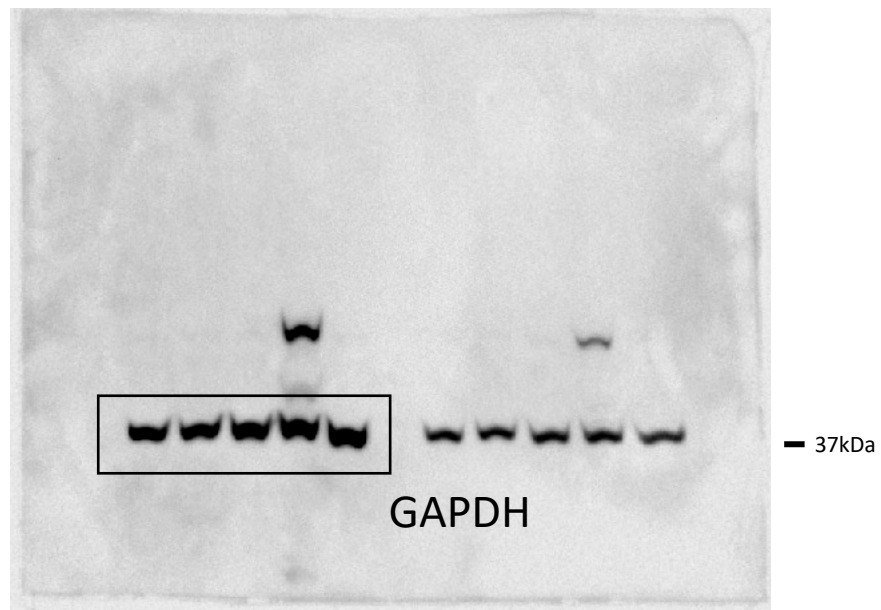

Figure S3E

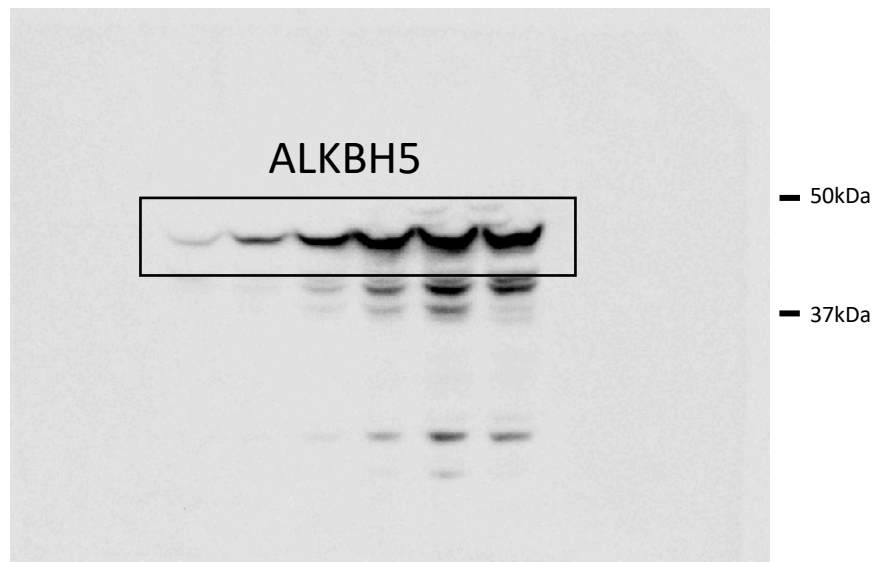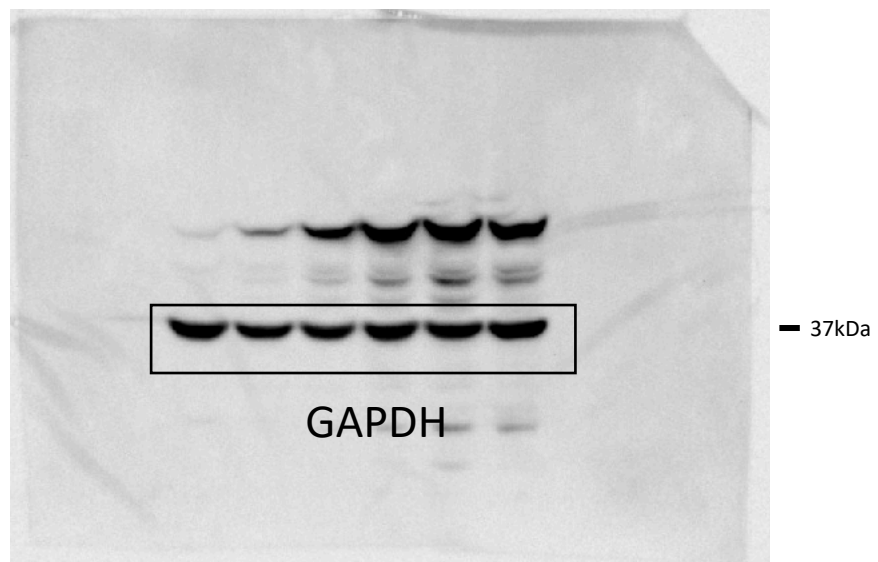

Supplement: 41417_2022_451_MOESM11_ESM.pdf [file 41417_2022_451_MOESM11_ESM.pdf]
